# Supplementary material
Source: PubMed Central journal article supplement (PMC7725996)
Supplement: NIHMS1628629-supplement-1.pdf [file NIHMS1628629-supplement-1.pdf]

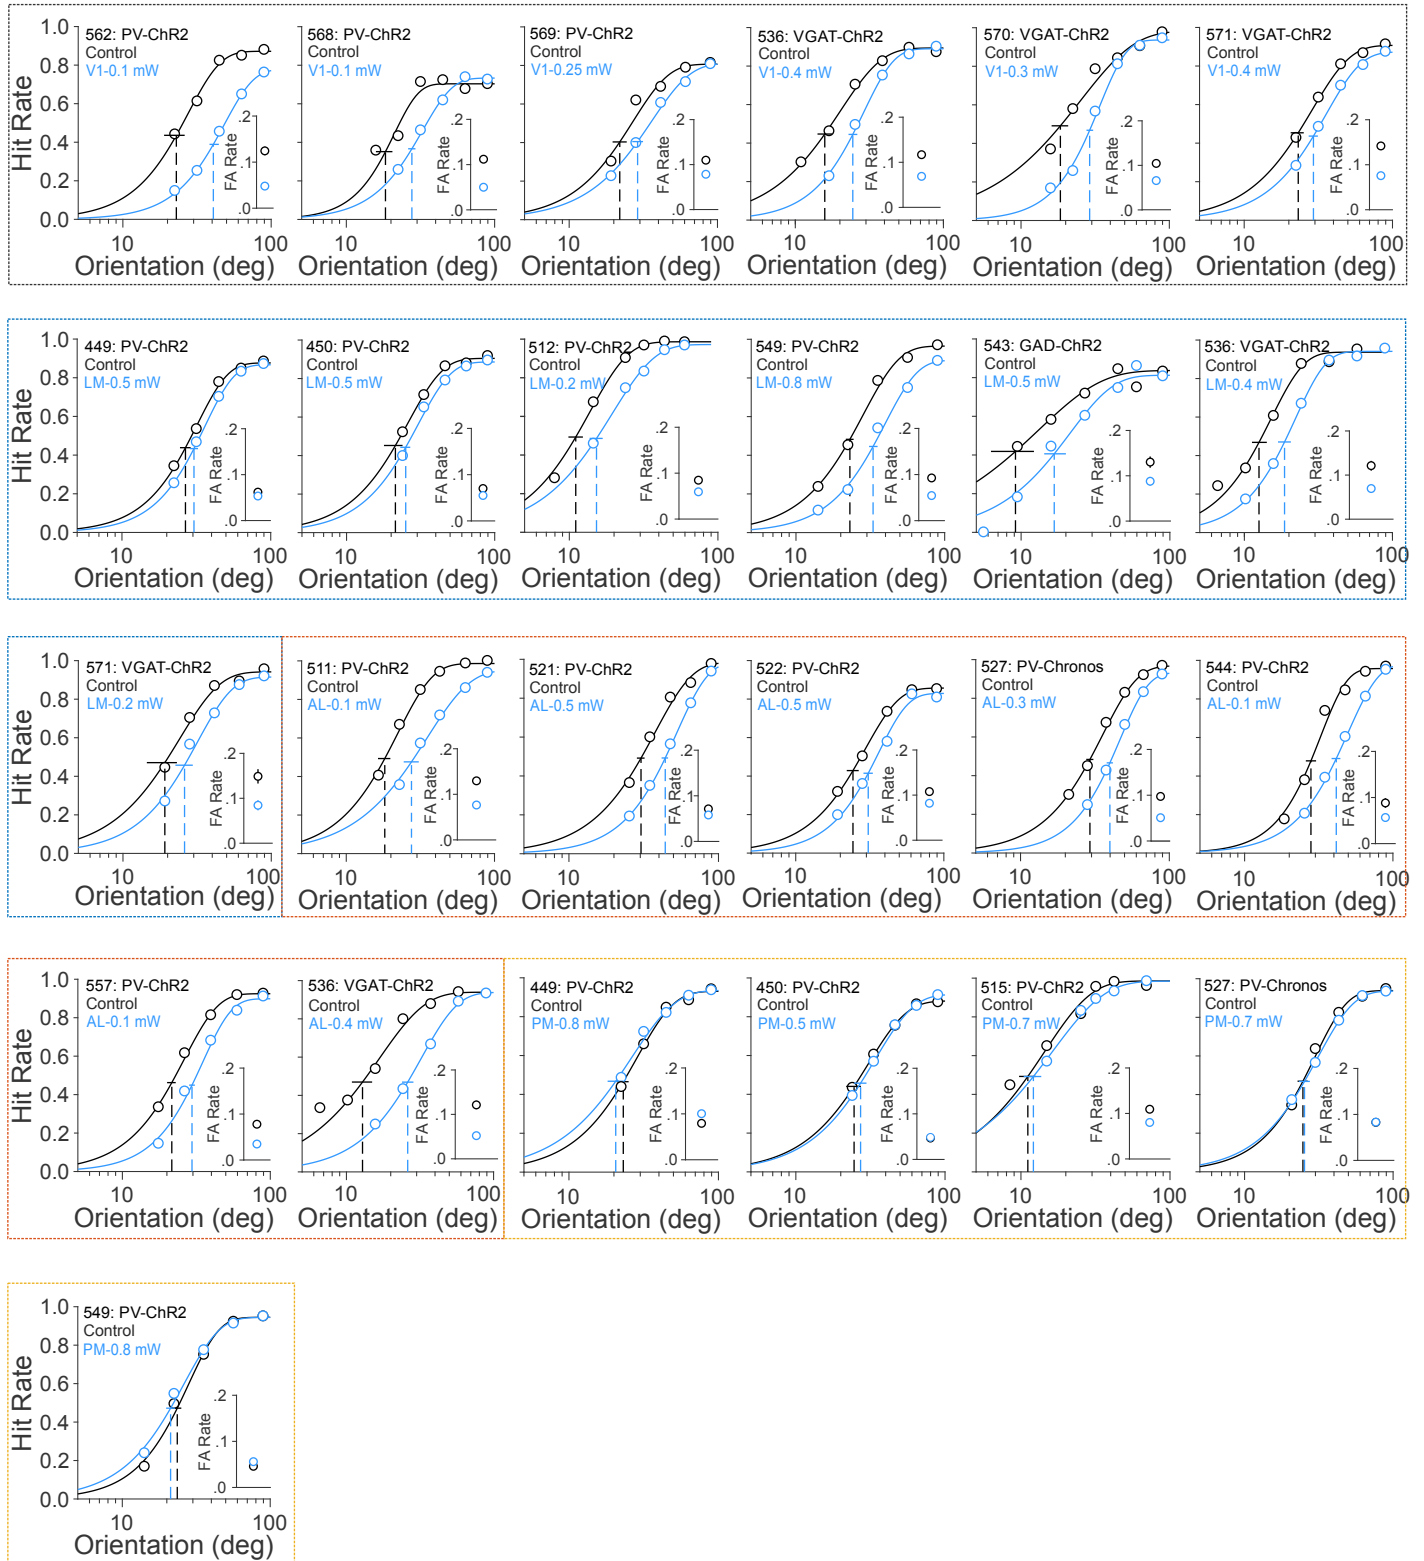

**Data S1. Behavior performance of all mice for discriminating orientations when visual stimuli were in the contralateral field of view (relative to the suppression site). Related to Figure 2 and STAR Methods. Figures are organized by areas (colored outlines: black- V1; blue- LM; red- AL; yellow- PM).**
