# Supplementary material
Source: PubMed Central journal article supplement (PMC7725996)
Supplement: NIHMS1628629-supplement-5.pdf [file NIHMS1628629-supplement-5.pdf]

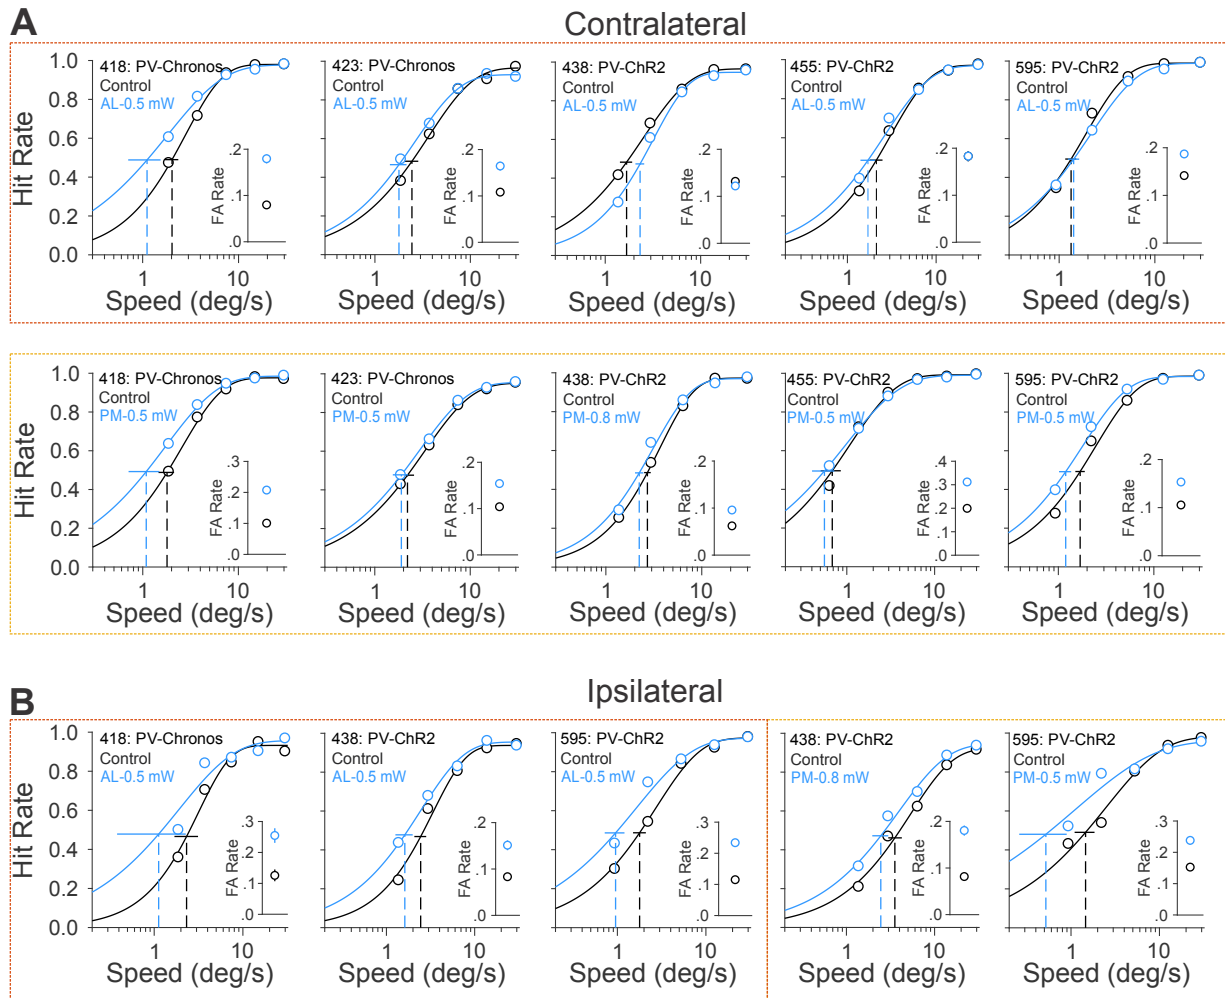

**Data S5. Behavior performance of all mice for detecting speed increment when visual stimuli were in the contralateral (A) and ipsilateral (B) field of view (relative to the suppression site). Related to Figure 5 and STAR Methods. Figures are organized by areas (colored outlines: black- V1; blue- LM; red- AL; yellow- PM).**
